# Supplementary material
Source: MDPI journal article supplement (https://www.mdpi.com/1999-4907/8/9/350)
Supplement: s1 [file s1]

## Sheet: Sheet1
Method	Independent Method	Species	Linear Regression Slope	R2	Deviation from Slope (%)	Source	Reference
T-max	Potometer	Actinidia chinensis 'Hort16A'	0.944	0.922	5.6	Figure 2	Prendergast et al. Acta Hort 2007:753;535-538.
T-max	Weighing Lysimeter	Citrus × clementina var. Clemenules	0.69	0.548	31	Figure 5	González-Altozano et al. 4th International Workshop on Measuring Sap Flow in Intact Plants. Brno, Czech Republic. 1998.
T-max	Weighing Lysimeter	Vitis vinifera	1	0.903	0	In Text	Green. Acta Hort 2008:321-332.
T-max	Canopy Gas Exchange	Vitis vinifera cv. Riesling	0.43	0.903	57	Figure 3	Intrigliolo et al. Acta Hort 2009:846;177-184.
T-max	Canopy Gas Exchange	Vitis vinifera cv. Riesling	0.46	0.884	54	Figure 3	Intrigliolo et al. Acta Hort 2009:846;177-184.
T-max	Canopy Gas Exchange	Vitis vinifera cv. Riesling	0.72	0.96	28	Figure 3	Intrigliolo et al. Acta Hort 2009:846;177-184.
T-max	Canopy Gas Exchange	Vitis vinifera cv. Riesling	0.46	0.757	54	Figure 3	Intrigliolo et al. Acta Hort 2009:846;177-184.
T-max	Canopy Gas Exchange	Vitis vinifera cv. Riesling	1.19	0.903	19	Figure 3	Intrigliolo et al. Acta Hort 2009:846;177-184.
T-max	Canopy Gas Exchange	Vitis vinifera cv. Riesling	0.35	0.865	65	Figure 3	Intrigliolo et al. Acta Hort 2009:846;177-184.
T-max	Finite Element Modelling		0.48	1	52	Table 3	Vandegehuchte and Steppe. New Phy 2012;196:306-317.
CHPM	Potometer	Actinidia deliciosa	0.625		37.5	Figure 3	Green and Clothier. J Exp Bot 1988:39;115-123.
CHPM	Potometer	Ceratopetalum apetalum	0.97	0.884	3	Table 1a	Barrett et al. Plant Cell Environ 1995:18;463–469
CHPM	Potometer	Ceratopetalum apetalum	0.81	0.846	19	Table 1a	Barrett et al. Plant Cell Environ 1995:18;463–469
CHPM	Weighing Lysimeter	Citrus × clementina var. Clemenules	0.54	0.656	46	Figure 5	González-Altozano et al. 4th International Workshop on Measuring Sap Flow in Intact Plants. Brno, Czech Republic. 1998.
CHPM	Canopy Gas Exchange	Citrus clementina	0.31	0.706	69	Table 1 (inverse of presented values)	Ballester et al. Acta Hort 2011:922;221-228.
CHPM	Canopy Gas Exchange	Citrus clementina	0.34	0.608	66	Table 1 (inverse of presented values)	Ballester et al. Acta Hort 2011:922;221-228.
CHPM	Canopy Gas Exchange	Citrus clementina	0.24	0.706	76	Table 1 (inverse of presented values)	Ballester et al. Acta Hort 2011:922;221-228.
CHPM	Canopy Gas Exchange	Citrus clementina	0.34	0.81	66	Table 1 (inverse of presented values)	Ballester et al. Acta Hort 2011:922;221-228.
CHPM	Canopy Gas Exchange	Citrus clementina	0.46	0.563	54	Table 1 (inverse of presented values)	Ballester et al. Acta Hort 2011:922;221-228.
CHPM	Canopy Gas Exchange	Citrus clementina	0.52	0.608	48	Table 1 (inverse of presented values)	Ballester et al. Acta Hort 2011:922;221-228.
CHPM	Canopy Gas Exchange	Citrus clementina	0.55	0.774	45	Table 1 (inverse of presented values)	Ballester et al. Acta Hort 2011:922;221-228.
CHPM	Canopy Gas Exchange	Citrus clementina	0.74	0.774	26	Table 1 (inverse of presented values)	Ballester et al. Acta Hort 2011:922;221-228.
CHPM	Weighing Lysimeter	Citrus cv. Clemntina de Nules	0.989	0.828	1.1	Table 1	Zreik et al. 5th International Symposium on Measuring Sap Flow in Intact Plants. Firence, Italy. 1999.
CHPM	Weighing Lysimeter	Citrus cv. Clemntina de Nules	0.746	0.578	25.4	Table 1	Zreik et al. 5th International Symposium on Measuring Sap Flow in Intact Plants. Firence, Italy. 1999.
CHPM	Potometer	Doryphora sassafras	1.01	0.846	1	Table 1a	Barrett et al. Plant Cell Environ 1995:18;463–469
CHPM	Potometer	Doryphora sassafras	0.93	0.903	7	Table 1a	Barrett et al. Plant Cell Environ 1995:18;463–469
CHPM	Potometer	Eucalyptus camaldulensis	0.95	0.98	5	Figure 1	Marshall et al. J Hydrol 1997:200;136-148.
CHPM	Potometer	Eucalyptus maculata	0.91	0.792	9	Table 1a	Barrett et al. Plant Cell Environ 1995:18;463–469
CHPM	Potometer	Eucalyptus maculata	1	0.81	0	Table 1a	Barrett et al. Plant Cell Environ 1995:18;463–469
CHPM	Weighing Lysimeter	Eucalyptus marginata	0.6	0.96	40	Table 1	Bleby et al. Func Plant Biol 2004;31:645-658.
CHPM	Weighing Lysimeter	Fagus grandifolia	0.6458		35.42	Figure 6c	Steppe et al. Agric For Meteorol 2010:150;1046–1056.
CHPM	Weighing Lysimeter	Malus communis	0.59	0.281	41	Figure 4	Ferrara and Flore. Biologia Plantarum 2003:46;41-47.
CHPM	Weighing Lysimeter	Malus domestica cv. Braeburn	0.617	0.96	38.3	Table 1	Mpelasoka et al. Irrig Sci 2001:20;101-107.
CHPM	Weighing Lysimeter	Malus domestica cv. Braeburn	1.095	0.98	9.5	Table 1	Mpelasoka et al. Irrig Sci 2001:20;101-107.
CHPM	Weighing Lysimeter	Malus domestica cv. Braeburn	0.774	0.96	22.6	Table 1	Mpelasoka et al. Irrig Sci 2001:20;101-107.
CHPM	Weighing Lysimeter	Malus domestica cv. Braeburn	1.338	0.98	33.8	Table 1	Mpelasoka et al. Irrig Sci 2001:20;101-107.
CHPM	Canopy Gas Exchange	Malus domestica cv. Royal Empire	0.71	0.941	29	Table 2	Dragoni et al. Agric For Meterol 2005:130;85-94.
CHPM	Canopy Gas Exchange	Malus domestica cv. Royal Empire	1.08	0.865	8	Table 2	Dragoni et al. Agric For Meterol 2005:130;85-94.
CHPM	Canopy Gas Exchange	Malus domestica cv. Royal Empire	2.84	0.922	184	Table 2	Dragoni et al. Agric For Meterol 2005:130;85-94.
CHPM	Canopy Gas Exchange	Malus domestica cv. Royal Empire	1.35	0.941	35	Table 2	Dragoni et al. Agric For Meterol 2005:130;85-94.
CHPM	Potometer	Malus sylvestris x Red Delicious	0.869	0.865	13.1	Table 3	Green and Clothier. J Exp Bot 1988:39;115-123.
CHPM	Potometer	Pinus patula	1.332	0.723	33.2	Table 2	Dye et al. J Exp Bot 1991:42;867-870.
CHPM	Potometer	Pinus patula	1.154	0.64	15.4	Table 2	Dye et al. J Exp Bot 1991:42;867-870.
CHPM	Potometer	Pinus patula	1.224	0.81	22.4	Table 2	Dye et al. J Exp Bot 1991:42;867-870.
CHPM	Potometer	Pinus patula	1.126	0.656	12.6	Table 2	Dye et al. J Exp Bot 1991:42;867-870.
CHPM	Potometer	Pinus patula	1.001	0.49	0.1	Table 2	Dye et al. J Exp Bot 1991:42;867-870.
CHPM	Potometer	Pinus patula	1.33	0.723	33	Table 2	Dye et al. J Exp Bot 1991:42;867-870.
CHPM	Potometer	Pinus patula	1.129	0.74	12.9	Table 2	Dye et al. J Exp Bot 1991:42;867-870.
CHPM	Potometer	Pinus patula	0.017	0	98.3	Table 2	Dye et al. J Exp Bot 1991:42;867-870.
CHPM	Potometer	Pinus patula	0.897	0.757	10.3	Table 2	Dye et al. J Exp Bot 1991:42;867-870.
CHPM	Potometer	Pinus patula	1.332	0.397	33.2	Table 2	Dye et al. J Exp Bot 1991:42;867-870.
CHPM	Potometer	Pinus patula	0.742	0.98	25.8	Table 2	Dye et al. J Exp Bot 1991:42;867-870.
CHPM	Potometer	Pinus patula	0.88	0.504	12	Table 2	Dye et al. J Exp Bot 1991:42;867-870.
CHPM	Potometer	Pinus patula	0.902	0.397	9.8	Table 2	Dye et al. J Exp Bot 1991:42;867-870.
CHPM	Potometer	Pinus patula	0.37	0.116	63	Table 2	Dye et al. J Exp Bot 1991:42;867-870.
CHPM	Potometer	Populus deltoides		0.941		In Text	Smith. S Afr J Bot 1992:58;100-104.
CHPM	Stem Heat Balance Sensor	Populus trichocarpa x deltoides	0.678	1	32.2	Figure 4	Hall et al. Agric For Meteorol 1998:90;275-290.
CHPM	Weighing Lysimeter	Prunus salicina cv. Santa Rosa and Golden Japan	1.039	0.903	3.9	Table 1	Zreik et al. 5th International Symposium on Measuring Sap Flow in Intact Plants. Firence, Italy. 1999.
CHPM	Weighing Lysimeter	Prunus salicina cv. Santa Rosa and Golden Japan	1.06	0.757	6	Table 1	Zreik et al. 5th International Symposium on Measuring Sap Flow in Intact Plants. Firence, Italy. 1999.
CHPM	Weighing Lysimeter	Prunus salicina cv. Santa Rosa and Golden Japan	0.654	0.884	34.6	Table 1	Zreik et al. 5th International Symposium on Measuring Sap Flow in Intact Plants. Firence, Italy. 1999.
CHPM	Weighing Lysimeter	Prunus salicina cv. Santa Rosa and Golden Japan	1.028	0.865	2.8	Table 1	Zreik et al. 5th International Symposium on Measuring Sap Flow in Intact Plants. Firence, Italy. 1999.
CHPM	Weighing Lysimeter	Prunus salicina cv. Santa Rosa and Golden Japan	1.019	0.706	1.9	Table 1	Zreik et al. 5th International Symposium on Measuring Sap Flow in Intact Plants. Firence, Italy. 1999.
CHPM	Weighing Lysimeter	Prunus salicina cv. Santa Rosa and Golden Japan	1.05	0.792	5	Table 1	Zreik et al. 5th International Symposium on Measuring Sap Flow in Intact Plants. Firence, Italy. 1999.
CHPM	Weighing Lysimeter	Pyrus serotina	1.018	0.922	1.8	Table 1	Caspari et al. Agric For Meteorol 1993:67;13-27.
CHPM	Weighing Lysimeter	Pyrus serotina	0.957	0.593	4.3	Table 1	Caspari et al. Agric For Meteorol 1993:67;13-27.
CHPM	Weighing Lysimeter	Pyrus serotina	0.658	0.757	34.2	Table 2	Caspari et al. J Amer Soc Hort Sci 1993:118;562-569.
CHPM	Weighing Lysimeter	Pyrus serotina	0.782	0.689	21.8	Table 2	Caspari et al. J Amer Soc Hort Sci 1993:118;562-569.
CHPM	Weighing Lysimeter	Vitis vinifera cv. Sultana	0.872	0.774	12.8	Figure 1	Yunusa et al. Irrig Sci 2000:20;1-8.
CHPM	Finite Element Modelling		0.31	0.98	69	Table 3	Vandegehuchte and Steppe. New Phy 2012;196:306-317.
HRM	Weighing Lysimeter	Eucalyptus marginata	0.9	0.98	10	Table 1	Bleby et al. Func Plant Biol 2004;31:645-658.
HRM	Weighing Lysimeter	Eucalyptus marginata	1.0013	0.96	0.13	Figure 1	Burgess et al. Tree Physiol 2000:20;909-913.
HRM	Weighing Lysimeter	Eucalyptus marginata	0.919	0.98	8.1	Figure 5a	Burgess et al. Tree Physiol 2001:21;589-598.
HRM	Weighing Lysimeter	Eucalyptus marginata	0.939	0.98	6.1	Figure 5b	Burgess et al. Tree Physiol 2001:21;589-598.
HRM	Weighing Lysimeter	Fagus sylvatica	0.61	0.98	39	In Text	Vandegehuchte and Steppe. New Phy 2012;196:306-317.
HRM	Weighing Lysimeter	Pittosporum crassifolium		0.96		Figure 5b	Clearwater et al. Plant Cell Environ 2009:32;1652-1663.
HRM	Weighing Lysimeter	Salix matsudana	0.5679	0.462	43.21	Figure 5	Wang et al. Soil Sci Soc Am J 2015:79;1545-1555.
HRM	Leaf Gas Exchange	Schefflera arboricola		0.98		Figure 5a	Clearwater et al. Plant Cell Environ 2009:32;1652-1663.
HRM	Weighing Lysimeter	Syagrus romanzoffiana	1.01	0.922	1	Figure 3	Madurapperuma et al. Environ Exp Bot 2009:66;372-380.
HRM	Finite Element Modelling		0.56	0.98	44	Table 3	Vandegehuchte and Steppe. New Phy 2012;196:306-317.
HRM	Potometer		0.99	0.98	1	Table 2	Fuchs et al. Agric For Meteorol 2017:doi:10.1016/j.agrformet.2017.04.003
Sapflow+	Weighing Lysimeter	Fagus sylvatica	0.61	0.98	39	In Text	Vandegehuchte and Steppe. New Phy 2012;196:306-317.
Sapflow+	Weighing Lysimeter	Fagus sylvatica	0.46	1	54	Table 4	Vandegehuchte and Steppe. New Phy 2012;196:306-317.
Sapflow+	Weighing Lysimeter	Fagus sylvatica	0.55	0.98	45	Table 4	Vandegehuchte and Steppe. New Phy 2012;196:306-317.
Sapflow+	Weighing Lysimeter	Fagus sylvatica	0.68	0.98	32	Table 4	Vandegehuchte and Steppe. New Phy 2012;196:306-317.
Sapflow+	Weighing Lysimeter	Fagus sylvatica	0.82	1	18	Table 4	Vandegehuchte and Steppe. New Phy 2012;196:306-317.
Sapflow+	Weighing Lysimeter	Fagus sylvatica	0.6	0.96	40	Table 4	Vandegehuchte and Steppe. New Phy 2012;196:306-317.
Sapflow+	Finite Element Modelling		0.62	1	38	Table 3	Vandegehuchte and Steppe. New Phy 2012;196:306-317.
Dual Heat Pulse	Weighing Lysimeter	Vitis vinifera L. cv. Thompson seedless (clone 2A)	0.43	0.865	57	Table 1	Pearsall et al. Func Plant Biol 2014;41:874-883.
Dual Heat Pulse	Weighing Lysimeter	Vitis vinifera L. cv. Thompson seedless (clone 2A)	0.63	0.922	37	Table 1	Pearsall et al. Func Plant Biol 2014;41:874-883.
Dual Heat Pulse	Weighing Lysimeter	Vitis vinifera L. cv. Thompson seedless (clone 2A)	0.36	0.96	64	Table 1	Pearsall et al. Func Plant Biol 2014;41:874-883.
Dual Heat Pulse	Weighing Lysimeter	Vitis vinifera L. cv. Thompson seedless (clone 2A)	0.39	0.941	61	Table 1	Pearsall et al. Func Plant Biol 2014;41:874-883.
Dual Heat Pulse	Weighing Lysimeter	Vitis vinifera L. cv. Thompson seedless (clone 2A)	0.83	0.922	17	Table 1	Pearsall et al. Func Plant Biol 2014;41:874-883.
Dual Heat Pulse	Weighing Lysimeter	Vitis vinifera L. cv. Thompson seedless (clone 2A)	2	0.941	100	Table 1	Pearsall et al. Func Plant Biol 2014;41:874-883.
Dual Heat Pulse	Weighing Lysimeter	Vitis vinifera L. cv. Thompson seedless (clone 2A)	2.21	0.96	121	Table 1	Pearsall et al. Func Plant Biol 2014;41:874-883.
Dual Heat Pulse	Weighing Lysimeter	Vitis vinifera L. cv. Thompson seedless (clone 2A)	0.02	0.303	98	Table 1	Pearsall et al. Func Plant Biol 2014;41:874-883.
Dual Heat Pulse	Weighing Lysimeter	Vitis vinifera L. cv. Thompson seedless (clone 2A)	1.9	0.96	90	Table 1	Pearsall et al. Func Plant Biol 2014;41:874-883.
Dual Heat Pulse	Weighing Lysimeter	Vitis vinifera L. cv. Thompson seedless (clone 2A)	3.3	0.884	230	Table 1	Pearsall et al. Func Plant Biol 2014;41:874-883.
Dual Heat Pulse	Weighing Lysimeter	Vitis vinifera L. cv. Merlot	0.88	0.941	12	Table 2	Pearsall et al. Func Plant Biol 2014;41:874-883.
Dual Heat Pulse	Weighing Lysimeter	Vitis vinifera L. cv. Merlot	1.27	0.98	27	Table 2	Pearsall et al. Func Plant Biol 2014;41:874-883.
Dual Heat Pulse	Weighing Lysimeter	Vitis vinifera L. cv. Merlot	0.84	0.96	16	Table 2	Pearsall et al. Func Plant Biol 2014;41:874-883.
Dual Heat Pulse	Weighing Lysimeter	Vitis vinifera L. cv. Merlot	0.96	0.98	4	Table 2	Pearsall et al. Func Plant Biol 2014;41:874-883.
Dual Heat Pulse	Weighing Lysimeter	Vitis vinifera L. cv. Merlot	0.63	0.941	37	Table 2	Pearsall et al. Func Plant Biol 2014;41:874-883.
Dual Heat Pulse	Weighing Lysimeter	Vitis vinifera L. cv. Merlot	0.62	0.941	38	Table 2	Pearsall et al. Func Plant Biol 2014;41:874-883.
Dual Heat Pulse	Weighing Lysimeter	Vitis vinifera L. cv. Merlot	0.94	0.941	6	Table 2	Pearsall et al. Func Plant Biol 2014;41:874-883.
